# Supplementary material for: Pollinator mosaics mirror floral trait divergence within and between species of Castilleja
Source: bioRxiv or medRxiv preprint supplement (doi:10.1101/2022.07.04.498476), 2022-07-28
Supplement: Supplementary file [file media-2.pdf]

**Table S2.** Floral visitation data by species, population (Pop.), observation method (Dataset), and year. Data are presented as counts (number of visits), visitation rates (Rate; number of visits/ flower/ hour) and proportion of visits (Prop.; visits by each pollinator group divided by total visits) for each population-year-dataset datapoint by pollinator functional group, along with total number of visits, number of available flowers recorded (Total flrs), and Pollinator Diversity Index (Div. Index; log-transformed inverse Simpson's Diversity Index). Note that number of available flowers is an estimated value for Wide-view dataset observations (number of flowering stems in wide view multiplied by average number of flowers per stem recorded on narrow-view plants; see text for details).

| <i>C. purpurea</i> complex |             |      | Small/ medium bees |      |        | Large/ Bumblebees |        |         | Hawkmoths |       |         |
|----------------------------|-------------|------|--------------------|------|--------|-------------------|--------|---------|-----------|-------|---------|
| Pop.                       | Dataset     | Year | Count              | Rate | Prop.  | Count             | Rate   | Prop.   | Count     | Rate  | Prop.   |
| <i>C. citrina</i>          |             |      |                    |      |        |                   |        |         |           |       |         |
| CHCL                       | Narrow view | 2019 | 0                  | 0    | 0      | 8                 | 0.0078 | 0.57143 | 5         | 0.005 | 0.35714 |
|                            | Wide view   | 2019 | 0                  | 0    | 0      | 163               | 0.0141 | 0.62214 | 13        | 0.001 | 0.04962 |
| CLA                        | Narrow view | 2018 | 3                  | 0    | 0.1875 | 12                | 0.0044 | 0.75    | 1         | 4E-04 | 0.0625  |
|                            |             | 2019 | 13                 | 0.01 | 0.9286 | 0                 | 0      | 0       | 0         | 0     | 0       |
|                            | Wide view   | 2019 | 0                  | 0    | 0      | 0                 | 0      | 0       | 0         | 0     | 0       |
| CMSC                       | Narrow view | 2018 | 15                 | 0.01 | 0.4054 | 16                | 0.0141 | 0.43243 | 6         | 0.005 | 0.16216 |
|                            |             | 2019 | 0                  | 0    | 0      | 0                 | 0      | 0       | 11        | 0.024 | 1       |
|                            | Wide view   | 2019 | 3                  | 0    | 0.1875 | 0                 | 0      | 0       | 13        | 0.008 | 0.8125  |
| CQL                        | Narrow view | 2018 | 43                 | 0.03 | 0.9556 | 2                 | 0.0012 | 0.04444 | 0         | 0     | 0       |
|                            |             | 2019 | 1                  | 0    | 1      | 0                 | 0      | 0       | 0         | 0     | 0       |
|                            | Wide view   | 2019 | 7                  | 0    | 0.068  | 67                | 0.0064 | 0.65049 | 0         | 0     | 0       |
| <i>C. lindheimeri</i>      |             |      |                    |      |        |                   |        |         |           |       |         |
| LMN                        | Narrow view | 2019 | 0                  | 0    | 0      | 0                 | 0      | 0       | 0         | 0     | 0       |
|                            | Wide view   | 2019 | 0                  | 0    | 0      | 0                 | 0      | 0       | 0         | 0     | 0       |
| LRR                        | Narrow view | 2018 | 2                  | 0    | 0.0667 | 0                 | 0      | 0       | 0         | 0     | 0       |
|                            |             | 2019 | 0                  | 0    | 0      | 0                 | 0      | 0       | 0         | 0     | 0       |
|                            | Wide view   | 2019 | 0                  | 0    | 0      | 0                 | 0      | 0       | 0         | 0     | 0       |
| LVH                        | Narrow view | 2018 | 0                  | 0    | 0      | 0                 | 0      | 0       | 17        | 0.025 | 1       |
|                            |             | 2019 | 1                  | 0    | 0.25   | 0                 | 0      | 0       | 0         | 0     | 0       |
|                            | Wide view   | 2019 | 1                  | 0    | 0.0182 | 0                 | 0      | 0       | 3         | 9E-04 | 0.05455 |
| <i>C. purpurea</i>         |             |      |                    |      |        |                   |        |         |           |       |         |
| PCM                        | Narrow view | 2018 | 8                  | 0.01 | 0.08   | 0                 | 0      | 0       | 88        | 0.095 | 0.88    |
|                            |             | 2019 | 6                  | 0.01 | 0.2857 | 0                 | 0      | 0       | 12        | 0.017 | 0.57143 |
|                            | Wide view   | 2019 | 0                  | 0    | 0      | 59                | 0.0134 | 0.66292 | 21        | 0.005 | 0.23596 |
| PMT                        | Narrow view | 2018 | 23                 | 0.02 | 0.3382 | 21                | 0.0152 | 0.30882 | 19        | 0.014 | 0.27941 |
|                            |             | 2019 | 3                  | 0    | 0.4286 | 0                 | 0      | 0       | 0         | 0     | 0       |
|                            | Wide view   | 2019 | 0                  | 0    | 0      | 0                 | 0      | 0       | 0         | 0     | 0       |
| PTH                        | Narrow view | 2018 | 101                | 0.02 | 0.3556 | 1                 | 0.0002 | 0.00352 | 176       | 0.035 | 0.61972 |
|                            |             | 2019 | 29                 | 0.01 | 0.3537 | 0                 | 0      | 0       | 43        | 0.013 | 0.52439 |
|                            | Wide view   | 2019 | 8                  | 0    | 0.0406 | 4                 | 7E-05  | 0.0203  | 48        | 9E-04 | 0.24365 |
| PTMS                       | Narrow view | 2019 | 67                 | 0.02 | 0.9306 | 0                 | 0      | 0       | 2         | 7E-04 | 0.02778 |
|                            | Wide view   | 2019 | 3                  | 0    | 0.3    | 0                 | 0      | 0       | 0         | 0     | 0       |



| <i>C. purpurea</i> complex |         |      | Hummingbirds |      |       | Butterflies |      |       | Other visitors |      |       | Total  | Total | Div.  |
|----------------------------|---------|------|--------------|------|-------|-------------|------|-------|----------------|------|-------|--------|-------|-------|
| Pop.                       | Dataset | Year | Count        | Rate | Prop. | Count       | Rate | Prop. | Count          | Rate | Prop. | visits | flrs  | Index |
| <i>C. citrina</i>          |         |      |              |      |       |             |      |       |                |      |       |        |       |       |
| CHCL                       | Narrow  | 2019 | 0            | 0    | 0     | 1           | 0    | 0.071 | 0              | 0    | 0     | 14     | 140   | 0.778 |
|                            | Wide    | 2019 | 34           | 0    | 0.13  | 51          | 0    | 0.195 | 1              | 0    | 0     | 262    | 1578  | 0.811 |
| CLA                        | Narrow  | 2018 | 0            | 0    | 0     | 0           | 0    | 0     | 0              | 0    | 0     | 16     | 370   | 0.508 |
|                            |         | 2019 | 0            | 0    | 0     | 1           | 0    | 0.071 | 0              | 0    | 0     | 14     | 281   | 0.142 |
|                            | Wide    | 2019 | 0            | 0    | 0     | 0           | 0    | 0     | 0              | 0    | 0     | 0      | 347.2 | NA    |
| CMSC                       | Narrow  | 2018 | 0            | 0    | 0     | 0           | 0    | 0     | 0              | 0    | 0     | 37     | 155   | 0.974 |
|                            |         | 2019 | 0            | 0    | 0     | 0           | 0    | 0     | 0              | 0    | 0     | 11     | 63    | 0.000 |
|                            | Wide    | 2019 | 0            | 0    | 0     | 0           | 0    | 0     | 0              | 0    | 0     | 16     | 214.8 | 0.363 |
| CQL                        | Narrow  | 2018 | 0            | 0    | 0     | 0           | 0    | 0     | 0              | 0    | 0     | 45     | 221   | 0.089 |
|                            |         | 2019 | 0            | 0    | 0     | 0           | 0    | 0     | 0              | 0    | 0     | 1      | 137   | 0.000 |
|                            | Wide    | 2019 | 29           | 0    | 0.282 | 0           | 0    | 0     | 0              | 0    | 0     | 103    | 1436  | 0.679 |
| <i>C. lindheimeri</i>      |         |      |              |      |       |             |      |       |                |      |       |        |       |       |
| LMN                        | Narrow  | 2019 | 16           | 0.02 | 1     | 0           | 0    | 0     | 0              | 0    | 0     | 16     | 136   | 0.000 |
|                            | Wide    | 2019 | 209          | 0.06 | 1     | 0           | 0    | 0     | 0              | 0    | 0     | 209    | 462.3 | 0.000 |
| LRR                        | Narrow  | 2018 | 28           | 0.03 | 0.933 | 0           | 0    | 0     | 0              | 0    | 0     | 30     | 111   | 0.133 |
|                            |         | 2019 | 7            | 0.01 | 1     | 0           | 0    | 0     | 0              | 0    | 0     | 7      | 96    | 0.000 |
|                            | Wide    | 2019 | 123          | 0.01 | 0.528 | 110         | 0.01 | 0.472 | 0              | 0    | 0     | 233    | 1218  | 0.690 |
| LVH                        | Narrow  | 2018 | 0            | 0    | 0     | 0           | 0    | 0     | 0              | 0    | 0     | 17     | 94    | 0.000 |
|                            |         | 2019 | 3            | 0.01 | 0.75  | 0           | 0    | 0     | 0              | 0    | 0     | 4      | 70    | 0.470 |
|                            | Wide    | 2019 | 44           | 0.01 | 0.8   | 5           | 0    | 0.091 | 2              | 0    | 0.04  | 55     | 450.6 | 0.426 |
| <i>C. purpurea</i>         |         |      |              |      |       |             |      |       |                |      |       |        |       |       |
| PCM                        | Narrow  | 2018 | 0            | 0    | 0     | 4           | 0    | 0.04  | 0              | 0    | 0     | 100    | 127   | 0.245 |
|                            |         | 2019 | 0            | 0    | 0     | 3           | 0    | 0.143 | 0              | 0    | 0     | 21     | 96    | 0.847 |
|                            | Wide    | 2019 | 2            | 0    | 0.022 | 7           | 0    | 0.079 | 0              | 0    | 0     | 89     | 602.6 | 0.689 |
| PMT                        | Narrow  | 2018 | 3            | 0    | 0.044 | 2           | 0    | 0.029 | 0              | 0    | 0     | 68     | 188   | 1.236 |
|                            |         | 2019 | 0            | 0    | 0     | 0           | 0    | 0     | 4              | 0    | 0.57  | 7      | 280   | 0.673 |
|                            | Wide    | 2019 | 115          | 0.01 | 0.943 | 7           | 0    | 0.057 | 0              | 0    | 0     | 122    | 2088  | 0.114 |
| PTH                        | Narrow  | 2018 | 0            | 0    | 0     | 0           | 0    | 0     | 6              | 0    | 0.02  | 284    | 677   | 0.671 |
|                            |         | 2019 | 0            | 0    | 0     | 1           | 0    | 0.012 | 9              | 0    | 0.11  | 82     | 442   | 0.886 |
|                            | Wide    | 2019 | 24           | 0    | 0.122 | 94          | 0    | 0.477 | 19             | 0    | 0.1   | 197    | 7614  | 1.161 |
| PTMS                       | Narrow  | 2019 | 0            | 0    | 0     | 0           | 0    | 0     | 3              | 0    | 0.04  | 72     | 398   | 0.141 |
|                            | Wide    | 2019 | 0            | 0    | 0     | 6           | 0    | 0.6   | 1              | 0    | 0.1   | 10     | 3597  | 0.777 |

*C. sessiliflora*

| Pop. | Dataset | Year | Hummingbirds |      |       | Butterflies |      |       | Other visitors |      |       | Total visits | Total flrs | Div. Index |
|------|---------|------|--------------|------|-------|-------------|------|-------|----------------|------|-------|--------------|------------|------------|
|      |         |      | Count        | Rate | Prop. | Count       | Rate | Prop. | Count          | Rate | Prop. |              |            |            |
| SBL  | Narrow  | 2017 | 0            | 0    | 0     | 0           | 0    | 0     | 0              | 0    | 0     | 111          | 34         | 0.090      |
|      |         | 2018 | 0            | 0    | 0     | 0           | 0    | 0     | 0              | 0    | 0     | 69           | 46         | 0.000      |
|      |         | 2019 | 0            | 0    | 0     | 0           | 0    | 0     | 0              | 0    | 0     | 4            | 77         | 0.000      |
|      | Wide    | 2019 | 0            | 0    | 0     | 0           | 0    | 0     | 0              | 0    | 0     | 29           | 65.45      | 0.000      |
| SCL  | Narrow  | 2018 | 0            | 0    | 0     | 0           | 0    | 0     | 0              | 0    | 0     | 116          | 134        | 0.674      |
|      |         | 2019 | 0            | 0    | 0     | 0           | 0    | 0     | 0              | 0    | 0     | 48           | 73         | 0.083      |
|      | Wide    | 2019 | 0            | 0    | 0     | 0           | 0    | 0     | 0              | 0    | 0     | 18           | 139.9      | 0.220      |
| SDCR | Narrow  | 2017 | 0            | 0    | 0     | 0           | 0    | 0     | 0              | 0    | 0     | 184          | 60         | 0.670      |
| SFP  | Narrow  | 2018 | 0            | 0    | 0     | 0           | 0    | 0     | 0              | 0    | 0     | 0            | 11         | NA         |
|      |         | 2019 | 0            | 0    | 0     | 0           | 0    | 0     | 3              | 0.01 | 0.06  | 54           | 76         | 0.671      |
|      | Wide    | 2019 | 0            | 0    | 0     | 0           | 0    | 0     | 1              | 0    | 0.01  | 101          | 161        | 0.100      |
| SIC  | Narrow  | 2017 | 0            | 0    | 0     | 100         | 0.18 | 0.342 | 54             | 0.1  | 0.18  | 292          | 76         | 1.312      |
|      |         | 2018 | 0            | 0    | 0     | 0           | 0    | 0     | 1              | 0.01 | 0.08  | 13           | 21         | 0.153      |
|      |         | 2019 | 0            | 0    | 0     | 2           | 0    | 0.025 | 6              | 0.01 | 0.07  | 81           | 95         | 0.703      |
|      | Wide    | 2019 | 0            | 0    | 0     | 3           | 0    | 0.058 | 0              | 0    | 0     | 52           | 418        | 0.115      |
| SILB | Narrow  | 2017 | 0            | 0    | 0     | 0           | 0    | 0     | 0              | 0    | 0     | 0            | 110        | NA         |
|      |         | 2018 | 0            | 0    | 0     | 0           | 0    | 0     | 0              | 0    | 0     | 10           | 174        | 0.000      |
| SMP  | Narrow  | 2017 | 0            | 0    | 0     | 0           | 0    | 0     | 0              | 0    | 0     | 107          | 105        | 0.655      |
|      |         | 2018 | 0            | 0    | 0     | 0           | 0    | 0     | 0              | 0    | 0     | 33           | 111        | 0.941      |
|      |         | 2019 | 0            | 0    | 0     | 0           | 0    | 0     | 0              | 0    | 0     | 1            | 334        | 0.000      |
|      | Wide    | 2019 | 0            | 0    | 0     | 0           | 0    | 0     | 0              | 0    | 0     | 105          | 2496       | 0.000      |
| SNG  | Narrow  | 2018 | 0            | 0    | 0     | 0           | 0    | 0     | 1              | 0.01 | 0.04  | 24           | 25         | 0.083      |
|      |         | 2019 | 0            | 0    | 0     | 0           | 0    | 0     | 1              | 0    | 0     | 228          | 126        | 0.515      |
|      | Wide    | 2019 | 0            | 0    | 0     | 0           | 0    | 0     | 0              | 0    | 0     | 21           | 122.4      | 0.588      |
| SPB  | Narrow  | 2017 | 0            | 0    | 0     | 0           | 0    | 0     | 0              | 0    | 25    | 117          | 0.000      |            |
| SRS  | Narrow  | 2017 | 0            | 0    | 0     | 0           | 0    | 0     | 0              | 0    | 36    | 70           | 0.000      |            |
| SSC  | Narrow  | 2017 | 0            | 0    | 0     | 0           | 0    | 0     | 0              | 0    | 0     | 28           | 81         | 0.000      |
|      |         | 2018 | 0            | 0    | 0     | 0           | 0    | 0     | 0              | 0    | 0     | 24           | 25         | 0.000      |
| SYH  | Narrow  | 2018 | 0            | 0    | 0     | 0           | 0    | 0     | 0              | 0    | 0     | 55           | 21         | 0.320      |
|      |         | 2019 | 0            | 0    | 0     | 0           | 0    | 0     | 0              | 0    | 0     | 1            | 86         | 0.000      |
|      | Wide    | 2019 | 0            | 0    | 0     | 0           | 0    | 0     | 0              | 0    | 0     | 0            | 584.8      | NA         |
